# Supplementary material for: Accurate and noninvasive diagnosis of epithelial cancers through AND gate photoluminescence on tumor-derived small extracellular vesicles
Source: Royal Society of Chemistry journal article supplement (doi:10.1039/d3tb01675g), 2023-01-01
Supplement: d3tb01675g1.pdf [file d3tb01675g1.pdf]

## Supplementary Material

# Accurate and noninvasive diagnosis of the epithelial cancers through AND gate photoluminescence on tumor-derived small extracellular vesicles

Nanhang Zhu <sup>a</sup>, Xuekang Wang <sup>a</sup>, Xingyou Wang <sup>a</sup>, Yating Zeng <sup>a</sup>, Yue Yu <sup>a</sup>, Qiangying

Yi <sup>a\*</sup>, Yao Wu <sup>a\*</sup>

<sup>a</sup>National Engineering Research Center for Biomaterials, Sichuan University,

Chengdu 610064, P. R. China

*Corresponding Author:*

*\*E-mail: qyi@scu.edu.cn (Q.Y.).*

*\*E-mail: wuyao@scu.edu.cn (Y.W.).*

**Tab. S1** Detailed information of aptamer sequences and modifications.

| Name                     | Sequence (5' to 3')                                                                    | Modification         |
|--------------------------|----------------------------------------------------------------------------------------|----------------------|
| Apt <sub>EpCA</sub><br>M | CAC TAC AGA GGT TGC GTC TGT CCC ACG TTG TCA<br>TGG GGG GTT GGC CTG                     | 3'SH C6              |
| Apt <sub>MUC1</sub>      | TTTTTTTTTGCAGTTGATCCTTTGGATACCCTGG                                                     | 5'NH <sub>2</sub> C6 |
| temP                     | CCAGGGTATCCAAAGGATCAACTGCAAAAAAAAAACAGGCCA<br>ACCCCCATGACAACGTGGGACAGACGCAACCTCTGTAGTG |                      |

**Tab. S2** Information of clinical samples.

| No. | Cancer Type | Gender | Age | Diagnosis Information                                                      |
|-----|-------------|--------|-----|----------------------------------------------------------------------------|
| B1  | Breast      | Female | 50  | None ductal carcinoma in situ with<br>invasive carcinoma                   |
| B2  | Breast      | Female | 48  | Invasive ductal carcinoma                                                  |
| B3  | Breast      | Female | 85  | Invasive ductal carcinoma                                                  |
| B4  | Breast      | Female | 67  | Invasive ductal carcinoma                                                  |
| B5  | Breast      | Female | 50  | Invasive ductal carcinoma                                                  |
| B6  | Breast      | Female | 69  | Invasive ductal carcinoma                                                  |
| T1  | Lung        | Female | 49  | Malignant lung tumor                                                       |
| T2  | Liver       | Female | 69  | Hepatocellular carcinoma                                                   |
| T3  | Liver       | Female | 57  | Metastatic hepatocellular carcinoma                                        |
| T4  | Liver       | Female | 49  | Liver cancer/cirrhosis of the liver                                        |
| T5  | Esophageal  | Female | 58  | Upper thoracic esophageal cancer with<br>mediastinal lymph node metastasis |
| T6  | Thymus      | Female | 64  | Thymic carcinoma with metastasis to the<br>sternum and left sacrum         |
| H1  | Health      | Female | 60  | None                                                                       |
| H2  | Health      | Female | 45  | None                                                                       |
| H3  | Health      | Female | 28  | None                                                                       |
| H4  | Health      | Female | 50  | None                                                                       |

|    |        |        |    |      |
|----|--------|--------|----|------|
| H5 | Health | Female | 36 | None |
| H6 | Health | Female | 56 | None |

**Tab. S3** Capture efficiency of in the samples with different concentration of sEVs.

| Amount<br>( $\mu\text{g}$ ) | 1        | 2        | 3        | Average  | Captured | Capture<br>efficiency (%) |
|-----------------------------|----------|----------|----------|----------|----------|---------------------------|
| 1                           | 2.50E+09 | 2.40E+09 | 2.90E+09 | 2.60E+09 | 7.00E+08 | 21.21                     |
| 2                           | 2.50E+09 | 2.70E+09 | 2.30E+09 | 2.50E+09 | 8.00E+08 | 24.24                     |
| 4                           | 2.00E+09 | 1.80E+09 | 2.00E+09 | 1.93E+09 | 1.37E+09 | 41.41                     |
| 8                           | 7.80E+08 | 7.20E+08 | 9.20E+08 | 8.07E+08 | 2.49E+09 | 75.56                     |
| 10                          | 4.70E+08 | 3.30E+08 | 3.70E+08 | 3.90E+08 | 2.91E+09 | 88.18                     |
| 15                          | 3.30E+08 | 3.20E+08 | 3.70E+08 | 3.40E+08 | 2.96E+09 | 89.69                     |

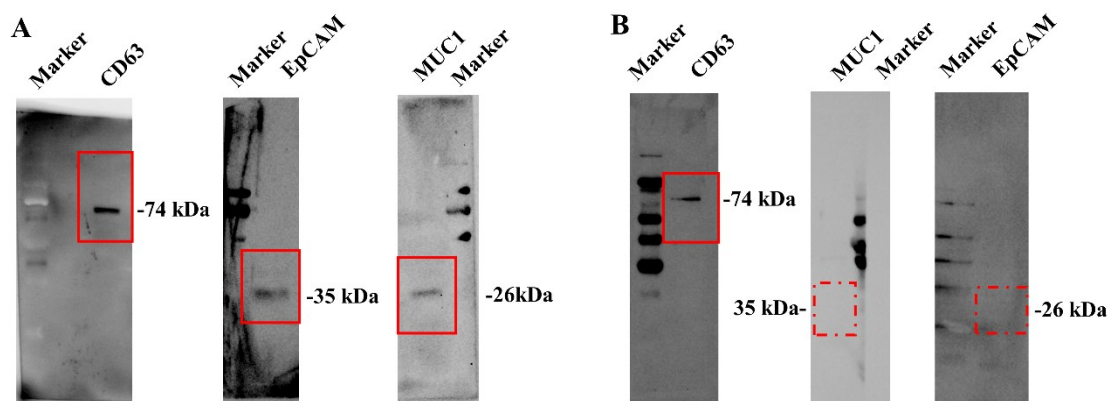

Fig. S1. The raw data from the western blotting experiments demonstrating the expression of one sEVs' marker and two breast cancer-related markers on (A) MCF-7 sEVs and (B) B16 sEVs.

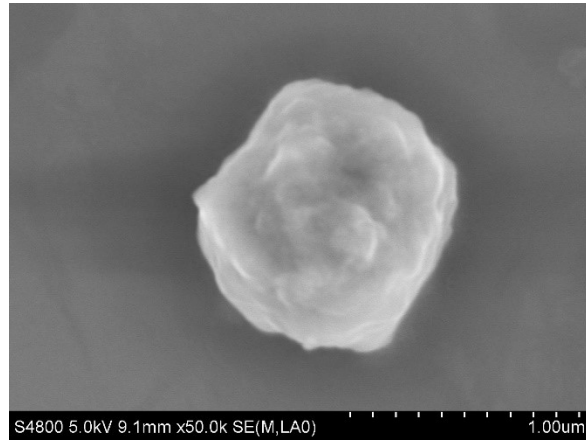

Fig. S2. SEM image of the streptavidin functionalized magnetic beads (SA-MBs).

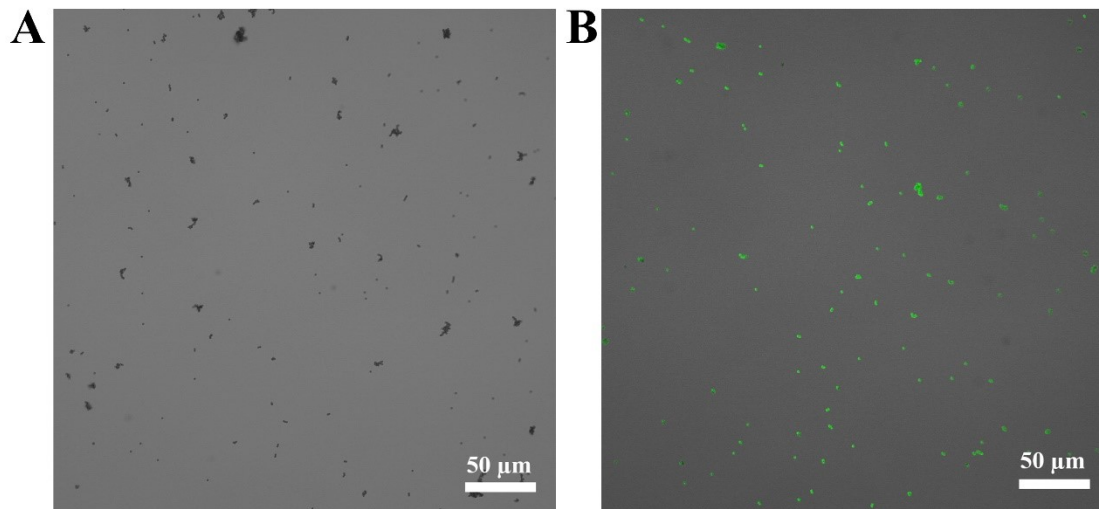

Fig. S3. CLSM images of FAM-labeled secondary antibody incubated with either (A) SA-MBs or (B) IMBs.

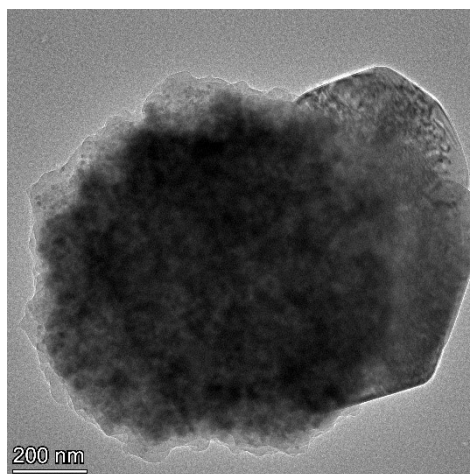

Fig. S4. TEM image of the streptavidin functionalized magnetic beads.

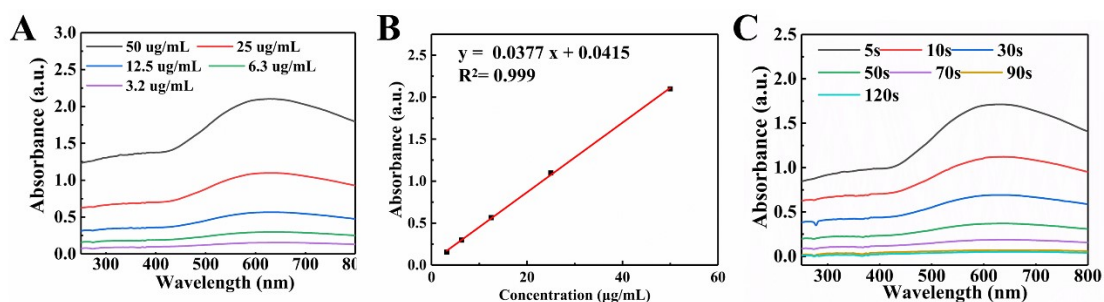

Fig. S5. (A) UV-vis absorbance spectra and (B) linear relationship showing the maximum absorbance at 632 nm of IMBs with varied concentrations. (C) UV-vis absorbance spectra of IMBs after isolation magnetically at different time points.

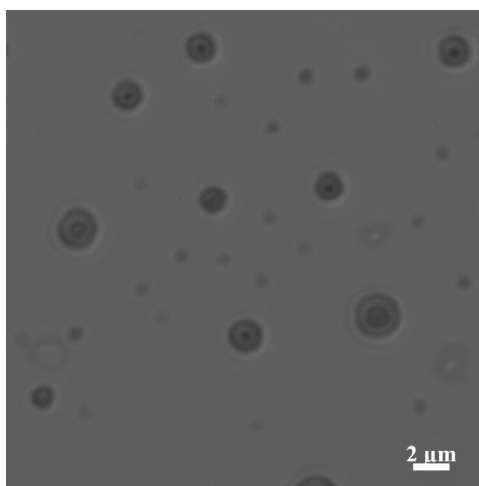

Fig. S6. CLSM image of SA-MBs incubated with PKH26-stained sEVs.

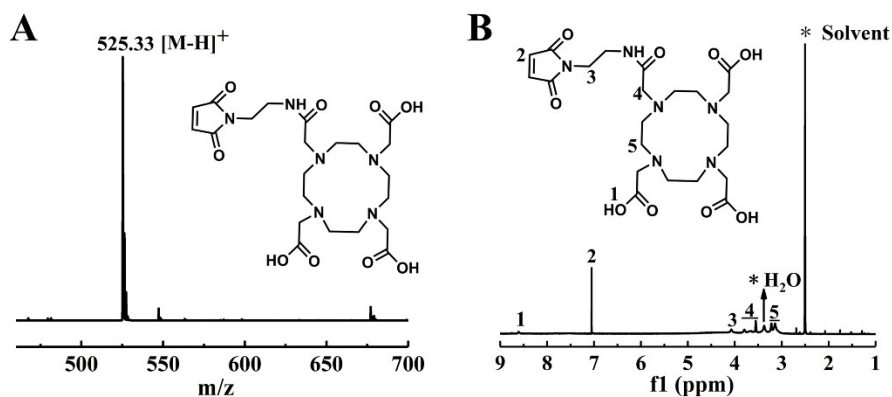

Fig. S7. (A) MALDI-TOF-MS spectrum of Mal-DOTA. Anal. Calcd for Mal-DOTA ( $C_{22}H_{34}N_6O_9$ ): C, 50.18; H, 6.15; N, 15.96; O, 27.35. MALDI-TOF-MS results for PTTA,  $m/z$  525.33,  $[M-H]^+$ . (B)  $^1H$ NMR spectrum of Mal-DOTA (400 MHz,  $DMSO-d_6$ , room temperature):  $\delta$  (ppm) 3.14-3.22 (m, 16 H), 3.55-3.79 (t, 8H), 4.07 (s, 2H), 7.05 (s, 2H), 8.61 (s, 3H).

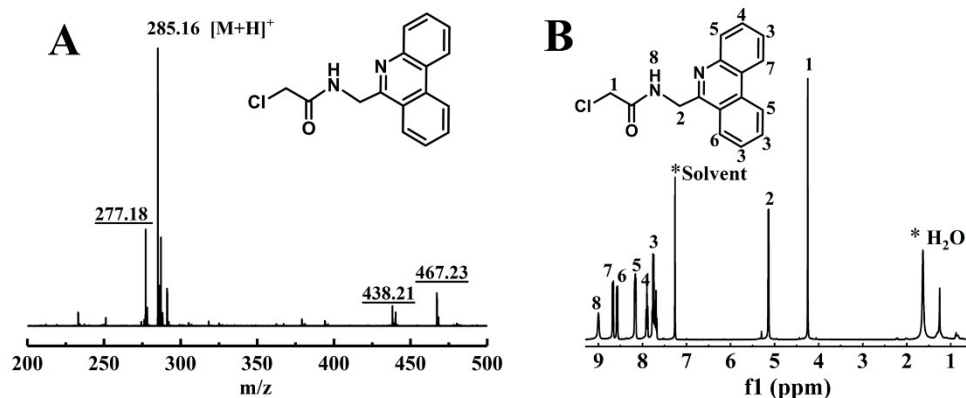

Fig. S8. (A) MALDI-TOF-MS spectrum of Cl-PA. Anal. Calcd for Cl-PA ( $C_{16}H_{13}ClN_2O$ ): C, 67.49; H, 4.60; Cl, 12.45; N, 9.84; O, 5.62. MALDI-TOF-MS results for PTTA,  $m/z$  285.16,  $[M-H]^+$ . (B)  $^1H$ NMR spectrum of Cl-PA (400 MHz,  $DMSO-d_6$ , room temperature). 4.24 (s, 2H), 5.13 (d, 2H), 7.76 (s, 3H), 7.89 (m, 1H), 8.16 (s, 2H), 8.56 (m, 1H), 8.66 (q, 1H), 8.99 (s, 1H).

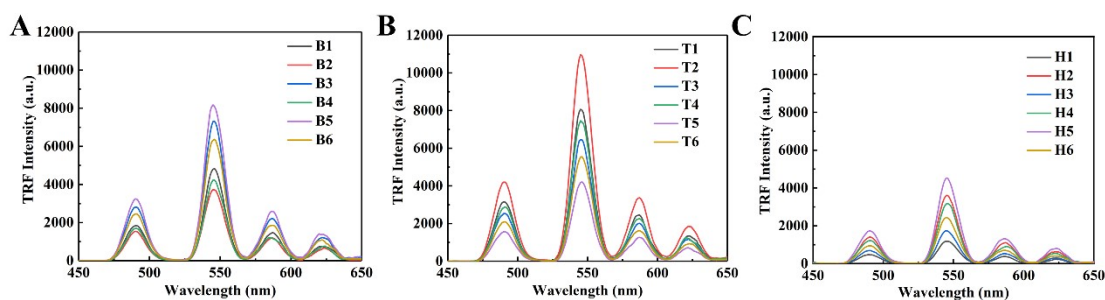

Fig. S9. The detection results of ALL strategy applied in human plasma samples from (A) Epithelial breast cancer, (B) Other epithelial cancers and (C) Healthy volunteers.

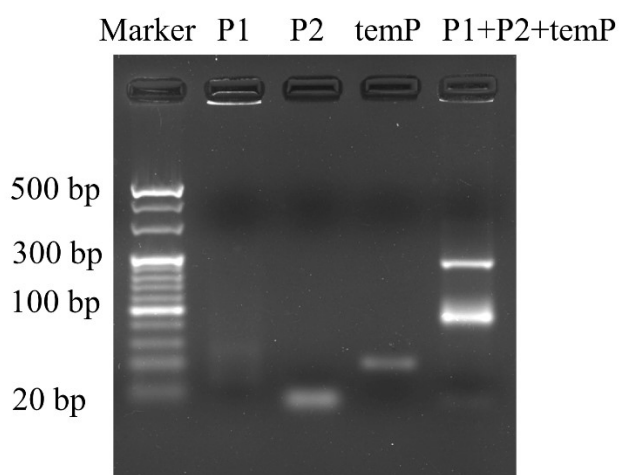

Fig. S10. Agarose electrophoresis to verify the feasibility of temP recognition.

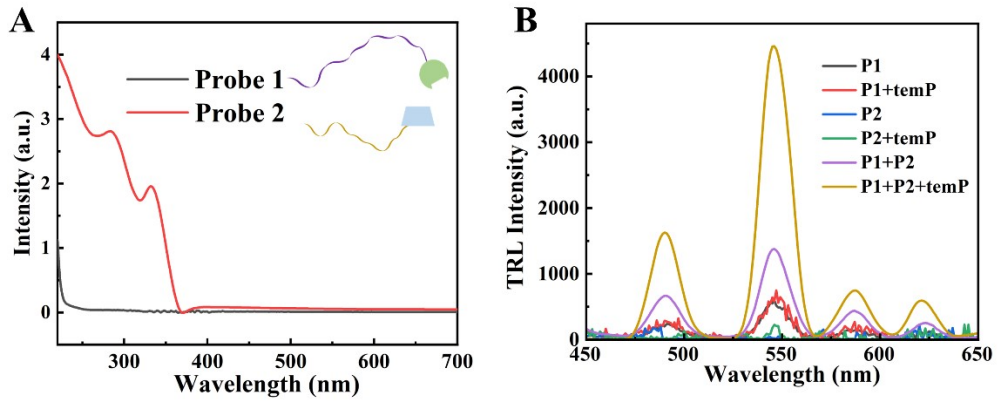

Fig. S11. (A) UV-vis spectra of P1 and P2, (B) TRL spectra of the designed probe precursor complexes or mixtures.

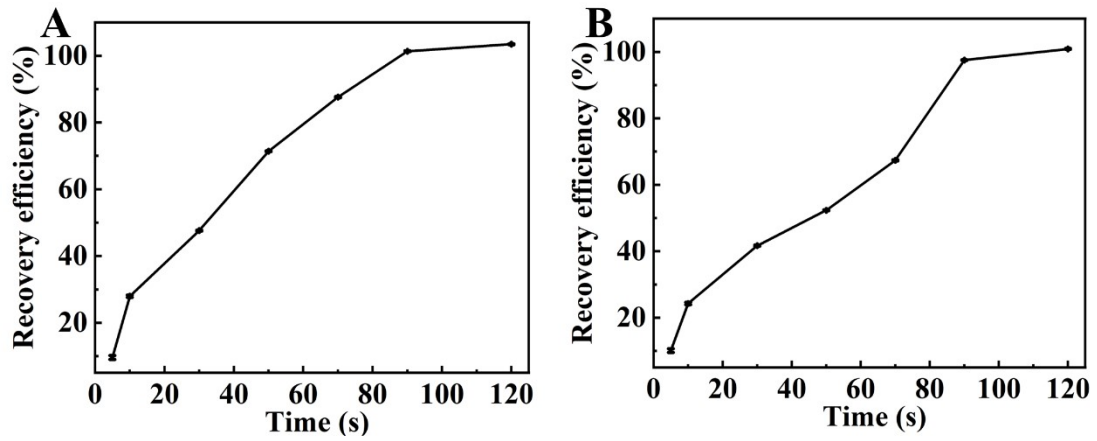

Fig. S12. Recovery efficiency of (A) IMBs@sEVs and (B) IMBs@sEVs@P1+P2.
